# Supplementary material for: PhenoMiner: from text to a database of phenotypes associated with OMIM diseases
Source: Oxford University Press journal article supplement (doi:10.1093/database/bav104), 2015-01-01
Supplement: bav104_Supplementary_Data.zip [file bav104_Supplementary_Data.zip]

Archive with 2 entries (2 files):
- S4.pdf
- S5.pdf
