# Supplementary material for: PhenoMiner: from text to a database of phenotypes associated with OMIM diseases
Source: Oxford University Press journal article supplement (doi:10.1093/database/bav104), 2015-01-01
Supplement: bav104_Supplementary_Data.zip [file bav104_Supplementary_Data.zip › S4.pdf]

## Supplementary Material S4:

### List of Abbreviations

|       |                                              |
|-------|----------------------------------------------|
| DOID  | Human Disease Ontology                       |
| EPR   | Electronic Patient Record                    |
| EQ    | Entity Quality representation                |
| FMA   | Foundation Model of Anatomy                  |
| GO    | Gene Ontology                                |
| HP    | Human Phenotype Ontology                     |
| MA    | Mouse Adult Gross Anatomy Ontology           |
| MEDIC | Merged Disease Vocabulary                    |
| MGD   | Mouse Genome Database                        |
| MP    | Mammalian Phenotype Ontology                 |
| NCBO  | National Center for Biomedical Ontology      |
| NER   | Named Entity Recognition                     |
| OMIM  | Online Mendelian Inheritance of Man database |
| ORDO  | Orphanet Rare Disease Ontology               |
| PATO  | Phenotypic Attribute and Trait Ontology      |
| PMID  | PubMed Identifier                            |
| PM    | PhenoMiner                                   |
| UMLS  | Unified Medical Language System              |
| XML   | Extensible Markup Language                   |
