# Supplementary material for: PhenoMiner: from text to a database of phenotypes associated with OMIM diseases
Source: Oxford University Press journal article supplement (doi:10.1093/database/bav104), 2015-01-01
Supplement: bav104_Supplementary_Data.zip [file bav104_Supplementary_Data.zip › S5.pdf]

---

## ***PhenoMiner Web Search and REST guide***

*VERSION 1.1 (July 2015)*

**Authors: Nigel Collier<sup>1,2\*</sup> and Vu Tran Mai<sup>3</sup>**

<sup>1</sup> University of Cambridge, Cambridge, UK

<sup>2</sup> European Bioinformatics Institute, Hinxton, Cambridge, UK

<sup>3</sup> University of Engineering and Technology – VNU, VietNam

\* To whom correspondence should be addressed

---

#### SCOPE NOTE

This report outlines the search interface and REST interface for the PhenoMiner database.

#### LICENSE

This work is licensed under a [Creative Commons Attribution 4.0 International License](https://creativecommons.org/licenses/by/4.0/).

#### CONTACT

For further information about this technical report, please contact:

Nigel COLLIER

Department of Theoretical and Applied Linguistics

University of Cambridge

9 West Road, Cambridge, UK

# PhenoMiner Web Search and REST Guide

## Overview

Phenotypes play a key role in inferring the complex relationships between genes and human heritable diseases. Analysis of scientific and clinical phenotypes reported in the experimental literature has been curated manually to build high quality databases such as the Online Mendelian Inheritance of Man (OMIM). However, the identification and semantic harmonisation of phenotype descriptions is a time consuming process that struggles to come to grips with the diversity of human expressivity. High throughput text mining, enhanced with automated conceptual analysis now make it possible to identify phenotype mentions and to predict associative relationships with diseases. We show the effectiveness of our approach by comparing the results against the manually curated gold standards in the Human Phenotype Ontology (HPO) and the phenotype-disorder relations in OMIM.

Following a series of experiments we have applied text/data mining to extract and filter a set of phenotype candidates and link these to associated concepts and literature references. We now wish to make these available as a database and shared portal. The data and experiments are being written up and made available through various means – as journal and conference publications, as a downloadable XML database (through GitHub at <https://github.com/nhcollier/PhenoMiner> and CERN's Zenodo at DOI: 10.5281/zenodo.12493), as literature annotations (via EMBL-EBI's External Links service) and as a standalone demonstration database portal and REST interface. The last of these will be outlined in this document. The Web-GUI is available via: <http://phenominer.mml.cam.ac.uk/index.html> and the REST interface is available from: [phenominer.mml.cam.ac.uk:8080/phenominer/phenotype/search?q=](http://phenominer.mml.cam.ac.uk:8080/phenominer/phenotype/search?q=)

## Document Data Type (DTD) definition

The XML data file available for download from GitHub and Zenodo (DOI: 10.5281/zenodo.12493) contains text mined evidence about phenotypes. The evidence in the first release is gathered from mining the BMC open access full text collection and then verifying automatically using disease-phenotype associations across all of the PMC literature. The following DTD describing the formatted data we have mined:

```
<!ELEMENT annotationCollection (Term*)>
<!ELEMENT Term (qualifierList,Link*,Tree,associatedDisorders?,fullTextList,abstractList)>
<!ELEMENT qualifierList EMPTY>
<!ELEMENT Link EMPTY>
<!ELEMENT Tree (#PCDATA)>
<!ELEMENT associatedDisorders (disorder+)>
<!ELEMENT disorder (name,omim_id)>
<!ELEMENT name (#PCDATA)>
```

```
<!ELEMENT omim_id (#PCDATA)>
<!ELEMENT fullTextList (Id*)>
<!ELEMENT abstractList (Id*)>
<!ELEMENT Id (#PCDATA)>

<!--
!ATTLIST Term ID CDATA #REQUIRED>
!ATTLIST Term KEY CDATA #REQUIRED>
!ATTLIST Term EVIDENCE CDATA #REQUIRED>
!ATTLIST Term DATE CDATA #REQUIRED>
!ATTLIST Link text CDATA #REQUIRED>
!ATTLIST Link ontology CDATA #REQUIRED>
!ATTLIST Link ID CDATA #REQUIRED>
!ATTLIST Link evidence CDATA #REQUIRED>
!ATTLIST associatedDisorders source CDATA #REQUIRED>
!ATTLIST associatedDisorders min_supp CDATA #REQUIRED>
!ATTLIST associatedDisorders min_conf CDATA #REQUIRED>
!ATTLIST associatedDisorders df CDATA #REQUIRED>
!ATTLIST disorder supp CDATA #REQUIRED>
!ATTLIST disorder conf CDATA #REQUIRED>
!ATTLIST disorder lift CDATA #REQUIRED>
!ATTLIST disorder pval CDATA #REQUIRED>
!ATTLIST fullTextList source CDATA #REQUIRED>
!ATTLIST fullTextList df CDATA #REQUIRED>
!ATTLIST fullTextList retmax CDATA #REQUIRED>
-->
```

The elements and attributes are now described in detail:

### Element: Term

The data in this required element describes one complete phenotype term. There is no effort at this stage to unify or encode synonyms so different forms (e.g. plurals) might appear as distinct terms.

Attributes for Term include:

**ID** This is the surface form of the phenotype term as it appears in text

**KEY** This is a unique identifier within the S5 database.

**EVIDENCE** This is an evidence code showing how the information in the term was curated, i.e. the level of evidence supporting the phenotype annotation. The codes are the same as those used in the Human Phenotype Ontology database for compatibility (see <http://www.human-phenotype-ontology.org/contao/index.php/annotation-guide.html>). At the moment this only takes one value, 'ITM' stands for 'Inferred by Text Mining'. Other codes will include 'IEA' for 'Inferred from Electronic Annotation', 'PCS' for 'Published Clinical Study', 'TAS' for 'Traceable Author Statement'.

**DATE** The date on which the term annotation was created. The format is YYYY.MM.DD.

### Element: qualifierList

This data element is optional and will in the future encode all possible seen qualifiers that are encoded within the PATO 'qualitative:intensity:intensity' subtree, e.g. 'mild','moderate','remittent','severe'. PATO stands for Phenotypic Attribute and Trait Ontology.

#### Element: Link

The data in this field represents a link to an external annotation about the term or part of the term. This is important for grounding the semantics of the term in widely used external vocabularies, to allow interoperability and reasoning.

Attributes for Term include:

**text** This is the part of the term about which the annotation refers to

**ID** This is the URL (Universal Resource Indicator) for the external vocabulary entry

**evidence** This is the name of the agent who provided the link, e.g. 'NCBO Annotator' or 'Bio-Lark'

#### Element: Tree

The data in the Tree element has been provided by parsing the term in its original context using the MCCJ parser (McClosky Charniak Johnson parser). The tree element is a grammatical phrase structure tree with lexical and syntactic nodes (e.g. JJ stands for Adjective and CC stands for Conjunction).

#### Element: associatedDisorder

After discovering phenotype candidates we applied a filtering step to verify them through association with human disorders gathered from the Online Mendelian Inheritance of Man database. We applied the R package's Apriori algorithm for identifying disorder-phenotype rules. Association rule (AR) mining attempts to discover rules between frequently co-occurring items in a transaction data set. The set of OMIM disorders and their synonyms was obtained from MEDIC. PMIDs are used to label the transaction items and are found for each phenotypes and disorder by querying the PMC E-utils RESTful Web Service. We applied Apriori using a set of parameters (support, confidence, minimum length, target) so that we retained only those association rules with cardinality of 2, i.e. phenotype → disorder. The results for each phenotype are recorded in the associatedDisorder element.

Each associatedDisorder element consists of zero or more disorder elements describing the discovered OMIM association.

Attributes for associatedDisorder include:

**source** This is the source of evidence about the association. At the moment this takes only the value 'apriori'.

**min\_supp** This is the value of minimum support used in the Apriori algorithm

**min\_conf** This is the value of minimum confidence used in the Apriori algorithm

**df** This is the number of citations where the association between the phenotype and disorder could be found, i.e. the number of **disorder** elements contained in the **associatedDisorder** element.

Note that `minlen` and `maxlen` attributes were both set to 2 within Apriori but are not recorded in the XML data.

#### **Element: disorder**

Each disorder element consists of the name of the disorder and its OMIM identifier.

Attributes for `disorder` include:

- `supp` The level of support Apriori found for the phenotype-disorder association
- `conf` The level of confidence Apriori found for the phenotype-disorder association
- `lift` The level of lift Apriori found for the phenotype-disorder association
- `pval` The p-value Apriori found for the phenotype-disorder association using a Fisher's exact test.

#### **Element: name**

The name element corresponds to an entry in the DiseaseName element in the Comparative Toxicogenomics (CTD) database at <http://ctdbase.org> (Mount Desert Island Biological Laboratory).

#### **Element: omim\_id**

The `omim_id` entry corresponds to the OMIM unique identifier for the disorder concept.

#### **Element: fullTextList**

This element contains zero or more links to literature citations where the phenotype term has been found through a fielded search of full text articles in the PubMed Central database. The maximum number of returned citations was bounded at 10,000. In practice the number of phenotype terms which reach this limit is quite small (<5%).

Attributes for `fullTextList` include:

- `source` The source of evidence for the full text citation – this only takes one value at the moment which is 'eutils', i.e. the PubMed Central E-utilities Web interface (see <http://www.ncbi.nlm.nih.gov/books/NBK25499/>).
- `df` The number of documents returned by the source about the phenotype annotation
- `retmax` The maximum number of documents to be returned by the source

#### **Element: ID**

The ID contains the PubMed Identifier ([http://www.nlm.nih.gov/bsd/disted/pubmedtutorial/020\\_830.html](http://www.nlm.nih.gov/bsd/disted/pubmedtutorial/020_830.html)) of the literature citation where the phenotype term was found.

#### **Element: abstractList**

This element contains zero or more links to literature citations where the phenotype term has been found through a fielded search of abstracts in the PubMed Central database. The maximum number of returned citations was bounded at 10,000. In practice the number of phenotype terms which reach this limit is quite small (<5%).

Attributes for `abstractList` include:

**source** The source of evidence for the full text citation – this only takes one value at the moment which is ‘eutils’, i.e. the PubMed Central E-utilities Web interface (see <http://www.ncbi.nlm.nih.gov/books/NBK25499/>).

**df** The number of documents returned by the source about the phenotype annotation

**retmax** The maximum number of documents to be returned by the source

#### Element: ID

The ID contains the PubMed Identifier ([http://www.nlm.nih.gov/bsd/disted/pubmedtutorial/020\\_830.html](http://www.nlm.nih.gov/bsd/disted/pubmedtutorial/020_830.html)) of the literature citation where the phenotype term was found.

## REST search

A search request can be executed purely using a URI by providing request parameters to the PhenoMiner server.

e.g. [http://phenominer.mml.cam.ac.uk/search.html?q=\\*.:](http://phenominer.mml.cam.ac.uk/search.html?q=*.)

The parameters allowed in the URI are:

| ID | Name                                                                                                                                                                                                                                                   | Description                                                                          |
|----|--------------------------------------------------------------------------------------------------------------------------------------------------------------------------------------------------------------------------------------------------------|--------------------------------------------------------------------------------------|
| 1  | <b>q</b>                                                                                                                                                                                                                                               | The query string (See more section 3 Query syntax)                                   |
|    | <b>Example:</b><br><a abnormal="" href="http://phenominer.mml.cam.ac.uk:8080/phenominer/phenotype/_search?q=" kidney"="">http://phenominer.mml.cam.ac.uk:8080/phenominer/phenotype/_search?q="abnormal kidney"</a>                                     |                                                                                      |
| 2  | <b>fields</b>                                                                                                                                                                                                                                          | The selective stored fields of the document to return for each hit, comma delimited. |
|    | <b>Example:</b><br><a abnormal="" href="http://phenominer.mml.cam.ac.uk:8080/phenominer/phenotype/_search?q=" kidney"&amp;fields='id,key"'>http://phenominer.mml.cam.ac.uk:8080/phenominer/phenotype/_search?q="abnormal kidney"&amp;fields=id,key</a> |                                                                                      |
| 3  | <b>size</b>                                                                                                                                                                                                                                            | The number of hits to return. Defaults to 10.                                        |
|    | <b>Example:</b> <a abnormal="" href="http://phenominer.mml.cam.ac.uk:8080/phenominer/phenotype/_search?q=" kidney"&amp;size='4"'>http://phenominer.mml.cam.ac.uk:8080/phenominer/phenotype/_search?q="abnormal kidney"&amp;size=4</a>                  |                                                                                      |
| 4  | <b>pretty</b>                                                                                                                                                                                                                                          | Tells system to return pretty-printed JSON/XML results                               |
|    | <b>Example:</b> <a abnormal="" href="http://phenominer.mml.cam.ac.uk:8080/phenominer/phenotype/_search?q=" kidney"&amp;pretty"="">http://phenominer.mml.cam.ac.uk:8080/phenominer/phenotype/_search?q="abnormal kidney"&amp;pretty</a>                 |                                                                                      |

## Query syntax

| Query        | Decription                          | Example                     |
|--------------|-------------------------------------|-----------------------------|
| Normal       | Normal query and phrase/exact query | q="abnormal heart"          |
| Match all    | Match all data in database          | q=*.<br>q=*                 |
| Field        | Search on a field                   | q=id:"abnormal heart"       |
| Multi fields | Search on multi fields              | q=id:* AND link.text:sudden |

## Web-based GUI

You can type your phenotype terms query to input box. The query syntax is similar to the syntax shown above.

PHENOMINER SYSTEM

[Home](#) | [About](#) | [Downloads](#) | [Search help](#) | [Terms of Use](#) | [Copyright](#) | [Contact us](#)

# Phenominer

Text-data mining of phenotype relations from biomedical literatures

**Online database of phenotypes and associated disorders**

Search

Copyright by Nigel Collier's laboratory - 2014

**Online database of phenotypes and associated disorders**

abnormal heart Search

Phenotype terms ▼

Ontologies ▼

Disorders ▼

Values ▼

You searched for: abnormal heart (1018 results) Number of results ▼

Filters:

1
2
3
4
»

**abnormal heart sound types**

Key: P1M725 - Evidence: JTM - Date: 2014.07.18

Syntactic tree: (NP (JJ abnormal) (NN heart) (NN sound) (NNS types))

```

graph TD
    NP[NP] --- JJ[JJ]
    NP --- NN1[NN]
    NP --- NN2[NN]
    NP --- NNS[NNS]
    JJ --- abnormal[abnormal]
    NN1 --- heart[heart]
    NN2 --- sound[sound]
    NNS --- types[types]
          
```

| Disorder name                       | Metrics                                                                                    | OrimimID |
|-------------------------------------|--------------------------------------------------------------------------------------------|----------|
| X-linked Cardiac valvular dysplasia | Support: 2.846257e-07<br>Confidence: 0.1666667<br>Lift: 304.90202<br>P-Value: 1.964382e-05 |          |

[View abstracts](#)

The PhenoMiner system shows some fields related to each phenotype entity:

- ID
- Key
- Evidence
- Date
- Syntactic phrase structure tree
- List of terms (related to biomedical ontologies)
- List of disorders (related to phenotype entity)
- List of Pubmed Central abstracts

## abnormal kidney function

Key:PM810 - Evidence:ITM - Date:2014.07.18

Syntactic tree: (NP (JJ abnormal) (NN kidney) (NN function))

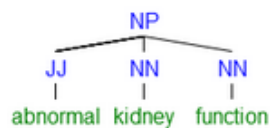

| Term            | Ontology                                               | Evidence       |
|-----------------|--------------------------------------------------------|----------------|
| abnormal        | Systematized Nomenclature of Medicine - Clinical Terms | NCBO Annotator |
| abnormal        | Phenotypic Quality Ontology                            | NCBO Annotator |
| abnormal        | Mammalian Phenotype Ontology                           | NCBO Annotator |
| kidney          | Systematized Nomenclature of Medicine - Clinical Terms | NCBO Annotator |
| kidney          | Foundation Model of Anatomy                            | NCBO Annotator |
| kidney          | Mammalian Phenotype Ontology                           | NCBO Annotator |
| function        | Systematized Nomenclature of Medicine - Clinical Terms | NCBO Annotator |
| function        | Mammalian Phenotype Ontology                           | NCBO Annotator |
| abnormal kidney | Human Phenotype Ontology                               | Bio-Lark       |

| Disorder name              | Metrics                                                                                   | OmimID      |
|----------------------------|-------------------------------------------------------------------------------------------|-------------|
| Essential Hypertension     | Support: 8.538771e-07<br>Confidence: 0.1111111<br>Lift: 39.53778<br>P-Value: 1.132452e-08 |             |
| Polycystic Kidney Diseases | Support: 1.423129e-06<br>Confidence: 0.1851852<br>Lift: 31.75107<br>P-Value: 8.619740e-13 | OMIM:173900 |

[View abstracts](#)

You can select the number of results using the drop down list:

Number of results ▾

- 10 per page
- 20 per page
- 40 per page
- 60 per page
- 80 per page
- 100 per page

Then use paging to view the results:

You searched for: abnormal heart (1018 results) Number of results ▾

Filters:

**Top pagination of results** 1 2 3 4 »

**Bottom pagination of results** 1 2 3 4 »

Copyright by Nigel Collier's laboratory - 2014

The PhenoMiner system will show list of terms (related to query) from Phenotype field, Ontology field, Disorder field and P-Value field. You can select terms in each fields to refine results.

Online database of phenotypes and associated disorders

abnormal heart Search

Phenotype terms ▼

glucose (37)

abnormal (37)

tolerance (10)

and (10)

regulation (6)

**RELATED TERMS**

newly (4)

metabolism (4)

test (3)

resistance (3)

insulin (3)

Ontologies ▼

Disorders ▼

Values ▼

You searched for: abnormal heart (37 results) Number of results ▼

Filters: Keyword: glucose ✕ Filter results by terms

1 2 3 4

**abnormal glucose values**

Key: PM663 - Evidence: ITM - Date: 2014.07.18

Syntactic tree: (NP (JJ abnormal) (NN glucose) (NNS values))

```

graph TD
    NP --> JJ
    NP --> NN
    NP --> NNS
    JJ --> abnormal
    NN --> glucose
    NNS --> values
  
```

abnormal glucose values

| Term     | Ontology                                               | Evidence       |
|----------|--------------------------------------------------------|----------------|
| abnormal | Systematized Nomenclature of Medicine - Clinical Terms | NCBO Annotator |
| abnormal | Phenotypic Quality Ontology                            | NCBO Annotator |
| glucose  | Systematized Nomenclature of Medicine - Clinical Terms | NCBO Annotator |
| glucose  | Foundation Model of Anatomy                            | NCBO Annotator |

To know more about the PhenoMiner database, you can select from the links at the top of the page:

[Home](#) | [About](#) | [Downloads](#) | [Search help](#) | [Terms of Use](#) | [Copyright](#) | [Contact us](#)

- About page: Basic introduction to the PhenoMiner project and database.
- Downloads page: You can find various resources related to the PhenoMiner project such as an annotated corpus, published papers and links to GitHub, Zenodo and Twitter.
- Search help page: A link to this file!
- Terms of Use page: conditions for accessing our system
- Copyright page: Information about copyright
- Contact us page: If you have any questions, please contact with us through information in this page.

PHENOMINER SYSTEM

Home | About | Downloads | Search help | Terms of Use | Copyright | Contact us

abnormal

Phenotype terms

Ontologies

Disorders

Values

number of results ▼

1234»

abnormal

Systematized Nomenclature of Medicine - Clinical Terms

NCBO Annotator

Downloads

- Download a guide to searching the PhenoMiner portal
- Download a guide to the REST search interface
- Download publications about PhenoMiner:
  - Collier, N., Tran, M. V., Le, H. Q., Oellrich, A., Kawazoe, A., Hall-May, M. and Rebholz-Schuhmann, D. (2012), "A hybrid approach to finding phenotype candidates in genetic texts", in Proceedings of the 24th International Conference on Computational Linguistics (COLING 2012), Mumbai, India, December 10-14.
  - Collier, N., Oellrich, A. and Groza, T. (2013), "Toward knowledge support for analysis and interpretation of complex traits", Genome Biology 14(9):214. [\[html\]](#)
  - Groza, T., Oellrich, A., & Collier, N. (2013), "Using silver and semi-gold standard corpora to compare open named entity recognisers", in 2013 IEEE International Conference on Bioinformatics and Biomedicine, IEEE BIBM 2013, pp. 481-485.
  - Collier, N., Tran, M., Le, H. Ha, Q., Oellrich, A. Rebholz-Schuhmann, D. (2013), "Learning to recognize phenotype candidates in the auto-immune literature using SVM re-ranking", PLoS One 8(10): e72965. [\[html\]](#)[\[pdf\]](#)
  - Collier, N., Paster, F. and Tran, M. V (2014), "The impact of near domain transfer on biomedical named entity recognition", in Proceedings of the 5th International Workshop on Health Text Mining and Information Analysis (Louhi) at EACL, pp. 11-20. [\[pdf\]](#)
  - Collier, N., Oellrich, A. and Groza, T. (2014), "Concept selection for phenotypes and disease-related annotations using support vector machines" in Proc. PhenoDay and Bio-Ontologies at ISMB 2014. [\[pdf\]](#)
- [Download the XML data for the database](#)
- [Download an annotated collection of named entity data about phenotypes associated with auto-immune diseases](#)
- [Download an annotated collection of named entity data about phenotypes associated with cardiovascular diseases](#)
- [Download a list of useful Textmining tools](#)
- Download the [single volume proceedings](#) of PhenoDay 2014 held in collaboration with Bio-Ontologies and Bio-Link at ISMB 2014.

Close
